# Supplementary material for: Low-affinity Nerve Growth Factor Receptor (CD271) Heterogeneous Expression in Adult and Fetal Mesenchymal Stromal Cells
Source: PubMed Central journal article supplement (PMC6006357; doi:10.1038/s41598-018-27587-8), 2018-06-18
Supplement: 41598_2018_27587_MOESM1_ESM.pdf [file 41598_2018_27587_MOESM1_ESM.pdf]

## **Low-affinity Nerve Growth Factor Receptor (CD271) Heterogeneous Expression in Adult and Fetal Mesenchymal Stromal Cells**

<sup>1</sup>Mario Barilani, <sup>1</sup>Federica Banfi, <sup>1</sup>Silvia Sironi, <sup>1</sup>Enrico Ragni, <sup>2,3</sup>Salomé Guillaumin, <sup>1</sup>Francesca Polveraccio, <sup>4,5</sup>Lorenzo Rosso, <sup>6</sup>Monica Moro, <sup>7</sup>Giuseppe Astori, <sup>8,9</sup>Michela Pozzobon and <sup>1,\*</sup>Lorenza Lazzari

<sup>1</sup>Laboratory of Regenerative Medicine – Cell Factory, Fondazione IRCCS Ca' Granda Ospedale Maggiore Policlinico, 20122, Milano, Italy

<sup>2</sup>Regenerative, Modular & Developmental Engineering Laboratory (REMODEL), Biomedical Sciences Building, National University of Ireland Galway (NUI Galway), H91 CF50, Galway, Ireland

<sup>3</sup>Science Foundation Ireland (SFI) Centre for Research in Medical Devices (CÚRAM), Biomedical Sciences Building, National University of Ireland Galway (NUI Galway), H91 CF50, Galway, Ireland

<sup>4</sup>Thoracic surgery and lung transplantation Unit, Fondazione IRCCS Ca' Granda Ospedale Maggiore Policlinico, 20122, Milano, Italy

<sup>5</sup>University of Milan, 20122, Milano, Italy

<sup>6</sup>INGM, National Institute of Molecular Genetics "Romeo ed Enrica Invernizzi", 20122, Milan, Italy

<sup>7</sup>Advanced Cellular Therapy Laboratory - Hematology Unit, S. Bortolo Hospital - ULSS 6, Contra' San Francesco 41, 36100, Vicenza, Italy

<sup>8</sup>Stem Cells and Regenerative Medicine Lab., Women's and Children's Health Dept., University of Padova, Via Giustiniani 3, 35128, Padova, Italy.

<sup>9</sup>Foundation Institute of Pediatric Research "Città della Speranza", Corso Stati Uniti 4, 35127, Padova, Italy.

\*Corresponding author (lead author)

Lorenza Lazzari, PhD

Laboratory of Regenerative Medicine – Cell Factory

Fondazione IRCCS Ca' Granda Ospedale Maggiore Policlinico

Via F. Sforza 35, 20122, Milano, Italy

Phone: +39 02 5503 4053; Fax: +39 02 5503 2796

Email: [lorenza.lazzari@policlinico.mi.it](mailto:lorenza.lazzari@policlinico.mi.it)

## Supplementary table 1

| Tube 1                                          | Fluorochrome      | Code     | Company                                   |
|-------------------------------------------------|-------------------|----------|-------------------------------------------|
| <i>Annexin V</i>                                | FITC              | 556419   | Becton Dickinson, Franklin Lakes, NJ, USA |
| <i>Mouse anti-human CD271</i>                   | PE                | 557196   | Becton Dickinson, Franklin Lakes, NJ, USA |
| <i>7-AAD</i>                                    | /                 | 559925   | Becton Dickinson, Franklin Lakes, NJ, USA |
| Tube 2                                          |                   |          |                                           |
| <i>Mouse anti-human PDGFR<math>\beta</math></i> | PE                | FAB1263P | R&D Systems, Minneapolis, MN, USA         |
| <i>Mouse anti-human CD146</i>                   | PE-Cyanine 7      | 562135   | Becton Dickinson, Franklin Lakes, NJ, USA |
| <i>Mouse anti-human CD56</i>                    | PE-Cyanine 5      | A07789   | Beckman Coulter, Bea, CA, USA             |
| Tube 3                                          |                   |          |                                           |
| <i>Mouse anti-human SSEA4</i>                   | FITC              | 560126   | Becton Dickinson, Franklin Lakes, NJ, USA |
| <i>Mouse anti-human NG2</i>                     | PE                | IM3454U  | Beckman Coulter, Bea, CA, USA             |
| <i>Mouse anti-human CD34</i>                    | PerCP-Cyanine 5.5 | 347222   | Becton Dickinson, Franklin Lakes, NJ, USA |
| Tube 4                                          |                   |          |                                           |
| <i>Mouse anti-human CD90</i>                    | PE                | 561970   | Becton Dickinson, Franklin Lakes, NJ, USA |
| <i>Mouse anti-human CD105</i>                   | PerCP-Cyanine 5.5 | 560819   | Becton Dickinson, Franklin Lakes, NJ, USA |
| <i>Mouse anti-human CD73</i>                    | PE-Cyanine 7      | 561258   | Becton Dickinson, Franklin Lakes, NJ, USA |
| <i>Mouse anti-human CD271</i>                   | AlexaFluor 647    | 560877   | Becton Dickinson, Franklin Lakes, NJ, USA |
| Tube 5                                          |                   |          |                                           |
| <i>Mouse anti-human CD34</i>                    | FITC              | 560942   | Becton Dickinson, Franklin Lakes, NJ, USA |
| <i>Mouse anti-human CD14</i>                    | PerCP-Cyanine 5.5 | 562692   | Becton Dickinson, Franklin Lakes, NJ, USA |
| <i>Mouse anti-human CD45</i>                    | APC-H7            | 560274   | Becton Dickinson, Franklin Lakes, NJ, USA |

## Supplementary table 1. Flow cytometry experimental layout.

## Supplementary figure 1

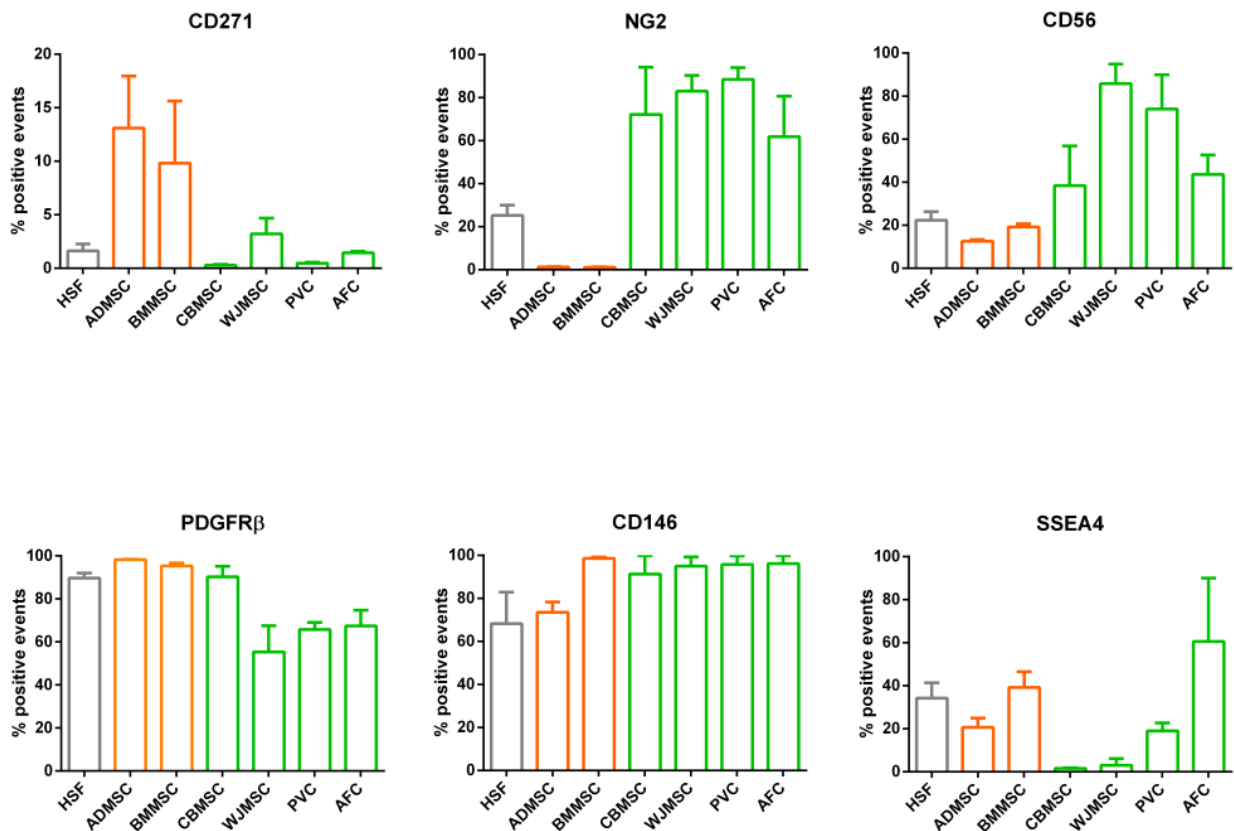

**Supplementary figure 1. Surface marker expression percentages.** The histograms show the percentages of surface marker expression (% positive events) for all the cell types analyzed by flow cytometry. HSF, human skin fibroblasts; ADMSC, adipose tissue mesenchymal stem cells; BMMSC, bone marrow mesenchymal stem cells; CBMSC, cord blood mesenchymal stem cells; WJMISC, Wharton's jelly mesenchymal stem cells; PVC, perivascular cells; AFC, amniotic fluid cells.
